# Supplementary material for: Efficacy of a Cosmetic Treatment in Decreasing the Mild-to-Moderate Atopic Dermatitis in Babies, Children, and Adults: A Pilot Study
Source: MDPI journal article supplement (doi:10.3390/cosmetics10040117), 2023-08-21
Supplement: s1 [file s1]

## SUPPLEMENTARY INFORMATION

### **Efficacy of a cosmetic treatment in decreasing the mild-to-moderate atopic dermatitis in babies, children, and adults: a pilot study.**

**Vincenzo Nobile <sup>1,\*</sup>, Valentina Zanoletti <sup>1</sup>, Marta Pisati <sup>2</sup> and Enza Cestone <sup>2</sup>**

<sup>1</sup> R&D Department, Complife Italia Srl, 27028 San Martino Siccomario, Italy;  
valentina.zanoletti@complifegroup.com

<sup>2</sup> Clinical Testing Department, Complife Italia Srl, 27028 San Martino Siccomario, Italy;  
marta.pisati@complifegroup.com (M.P.); enza.cestone@hotmail.it (E.C.)

\* Correspondence: vincenzo.nobile@complifegroup.com; Tel.: +39-0382-25504

**Supplementary Table S1.** Inclusion and exclusion criteria.

| No. | Inclusion criteria                                                                                                                                                                                                                                                                                                                                                                                               |
|-----|------------------------------------------------------------------------------------------------------------------------------------------------------------------------------------------------------------------------------------------------------------------------------------------------------------------------------------------------------------------------------------------------------------------|
| 01  | Female or male subjects                                                                                                                                                                                                                                                                                                                                                                                          |
| 02a | GROUP 1: 20 newborn/infant/toddler from 6 to 36 months                                                                                                                                                                                                                                                                                                                                                           |
| 02b | GROUP 2: 20 children from 3 to 14 years                                                                                                                                                                                                                                                                                                                                                                          |
| 02c | GROUP 3: 20 adults aged 18+                                                                                                                                                                                                                                                                                                                                                                                      |
| 03  | have skin that is dry/atopic or very dry/atopic (confirmed by the Paediatrician/dermatologist in consultation with the parent/legal guardian in case of minors, GROUP 1 and 2)                                                                                                                                                                                                                                   |
| 04  | have mild to moderate atopic eczema (mild DA is considered between 15-25 SCORAD and moderate DA is considered between 26-40 SCORAD)                                                                                                                                                                                                                                                                              |
| 05  | not undergoing steroid treatment for the condition                                                                                                                                                                                                                                                                                                                                                               |
| 06  | have only few or no pigmentation on the selected test site                                                                                                                                                                                                                                                                                                                                                       |
| 07  | be in general good health and mental conditions.                                                                                                                                                                                                                                                                                                                                                                 |
|     | In addition, in case of minors (GROUP 1 and 2) the parent/legal guardian must:                                                                                                                                                                                                                                                                                                                                   |
| 08  | provide written informed consent for their child/baby (both parents in case of shared custody/legal guardian) to participate in the investigation (children aged 6 years and above, capable of understanding the investigation after it has been explained to them, are asked to provide assent. Pre-schoolers (2-5 years) are allowed to express a level of assent verbally relating to their ability to do so) |
| 09  | agree to attend the investigation center, with the child/baby, on the predefined days                                                                                                                                                                                                                                                                                                                            |
| 10  | be willing and capable to follow the investigation requirements                                                                                                                                                                                                                                                                                                                                                  |
| No. | Exclusion criteria                                                                                                                                                                                                                                                                                                                                                                                               |
| 01  | Have chronic or acute skin diseases, except atopic eczema on any part of the body                                                                                                                                                                                                                                                                                                                                |
| 02  | known allergy or sensitivity to cosmetic products and/or any ingredients of the investigational product                                                                                                                                                                                                                                                                                                          |
| 03  | any systemic illness that would impact on the subject's safety or wellbeing and/or affect the response of the skin                                                                                                                                                                                                                                                                                               |
| 04  | receiving the following topical or systemic treatments at baseline (Day 0): anti-inflammatory and/or antihistamines during the previous 2-week, cough suppressants and/or topical or inhaled corticosteroids during the previous 2 weeks, retinoid and/or immunosuppressant during the previous 6 months                                                                                                         |
| 05  | have diabetes, acute cardiac and circulatory diseases, HIV, hepatitis                                                                                                                                                                                                                                                                                                                                            |
| 06  | participation in other studies/investigations on any part of the body during the last 4 weeks                                                                                                                                                                                                                                                                                                                    |
| 07  | use of dermatological therapeutics on the body within 7 days prior to baseline (Day 0)                                                                                                                                                                                                                                                                                                                           |
| 08  | swimming within 48 hours prior to baseline (Day 0)                                                                                                                                                                                                                                                                                                                                                               |
| 09  | intensive/prolonged exposure to the sun within 30 days prior to screening                                                                                                                                                                                                                                                                                                                                        |
| 10  | planned changes to subject's diet during the investigation (e.g., weaning)                                                                                                                                                                                                                                                                                                                                       |
| 11  | subjects in protective care                                                                                                                                                                                                                                                                                                                                                                                      |
| 12  | subjects whose parent/legal guardian (who will be applying the investigation product) is allergic to the investigation device ingredients                                                                                                                                                                                                                                                                        |
| 13  | any clinically significant and relevant abnormalities of medical history and/or any condition or medication that would impact on the subject safety or well-being and/or affect the response of the skin or the interpretation of the test results in the opinion of the Principal Investigator or designee.                                                                                                     |

**Supplementary Table S2.** Products qualitative formula.

| Active                                                                                                                                                                                                                                                                                                                                                                                                                                                                                                                                                                                                                                                                                                                                                                                                                                             | Placebo                                                                                                                                                                                                                                                                                                                                                                                                                                                                                                                                                                                                                                                                                                                                                                                                                                      |
|----------------------------------------------------------------------------------------------------------------------------------------------------------------------------------------------------------------------------------------------------------------------------------------------------------------------------------------------------------------------------------------------------------------------------------------------------------------------------------------------------------------------------------------------------------------------------------------------------------------------------------------------------------------------------------------------------------------------------------------------------------------------------------------------------------------------------------------------------|----------------------------------------------------------------------------------------------------------------------------------------------------------------------------------------------------------------------------------------------------------------------------------------------------------------------------------------------------------------------------------------------------------------------------------------------------------------------------------------------------------------------------------------------------------------------------------------------------------------------------------------------------------------------------------------------------------------------------------------------------------------------------------------------------------------------------------------------|
| <b>Novatopia emollient milk bath:</b> AQUA, COCAMIDOPROPYL BETAINE, GLYCERIN, SODIUM COCO-GLUCOSIDE TARTRATE, LAURYL GLUCOSIDE, SODIUM LAURYL SULFOACETATE, INULIN, GLYCERYL STEARATE, BUTYLENE GLYCOL, SODIUM LAUROYL GLUTAMATE, SODIUM CHLORIDE, PEG-7 GLYCERYL COCOATE, PANTHENOL, CETYL ALCOHOL, SODIUM LAUROYL SARCOSINATE, CAPRYLYL GLYCOL, DIISOPROPYL DIMER DILINOLEATE, SESAMUM INDICUM SEED OIL, COCOS NUCIFERA OIL, CHONDRUS CRISPUS POWDER, COCO-GLUCOSIDE, GLYCERYL OLEATE, ALPHA-GLUCAN OLIGOSACCHARIDE, PHOSPHOLIPIDS, CITRIC ACID, GLYCOL DISTEARATE, GLYCINE SOJA OIL, POTASSIUM SORBATE, XANTHAN GUM, PROPYLENE GLYCOL, ALISMA PLANTAGO AQUATICA EXTRACT, GLYCERYL CAPRYLATE, CHAMOMILLA RECUTITA FLOWER EXTRACT, PHENYLPROPANOL, GLYCOLIPIDS, TETRASODIUM GLUTAMATE DIACETATE, ORYZA SATIVA BRAN EXTRACT, GLYCINE SOJA STEROLS. | <b>Novatopia emollient milk bath (placebo):</b> AQUA, COCAMIDOPROPYL BETAINE, LAURYL GLUCOSIDE, SODIUM LAURYL SULFOACETATE, GLYCERIN, SODIUM CHLORIDE, GLYCERYL STEARATE, SODIUM LAUROYL GLUTAMATE, SODIUM COCO-GLUCOSIDE TARTRATE, SODIUM LAURETH SULFATE, CETYL ALCOHOL, SODIUM LAUROYL SARCOSINATE, CAPRYLYL GLYCOL, CITRIC ACID, CARRAGEENAN, GLYCOL DISTEARATE, SODIUM SULFATE, POTASSIUM SORBATE, XANTHAN GUM, PROPYLENE GLYCOL, GLUTAMIC ACID, SESAMUM INDICUM SEED OIL, GLYCERYL CAPRYLATE, COCOS NUCIFERA OIL, PANTHENOL, PEG-7 GLYCERYL COCOATE, LAURIC ACID, PHENYLPROPANOL, SODIUM BENZOATE, COCO-GLUCOSIDE, GLYCERYL OLEATE, DIISOPROPYL DIMER DILINOLEATE, PHOSPHOLIPIDS, GLYCINE SOJA OIL, PHENOXYETHANOL, GLYCOLIPIDS, GLYCINE SOJA STEROLS, TOCOPHEROL, HYDROGENATED PALM GLYCERIDES CITRATE, LECITHIN, ASCORBYL PALMITATE. |
| <b>Novatopia emollient cream:</b> AQUA(WATER), HYDROGENATED POLYDECENE, CETEARYL ALCOHOL, DIISOPROPYL DIMER DILINOLEATE, CAPRYLIC/CAPRIC TRIGLYCERIDE, GLYCERYL MYRISTATE, BUTYLENE GLYCOL, LANOLIN, GLYCERIN, COCOSNUCIFERA (COCONUT) OIL, DIMETHICONE, ETHYLHEXYL STEARATE, INULIN,TRILAURETH-4 PHOSPHATE,CETEARYL GLUCOSIDE,PANTHENOL, ALISMAPLANTAGOQUATICA EXTRACT, CAPRYLYL GLYCOL, PERSEAGRATISSIMA (AVOCADO) OIL, SODIUM STEAROYLACTYLATE, PHYTOSTEROLS, BUTYROSPERMUM PARKII (SHEA) BUTTER, ALPHA-GLUCAN OLIGOSACCHARIDE, XANTHAN GUM, CHAMOMILLARECUTITA FLOWER EXTRACT, OLEAEUROPAEA (OLIVE) FRUIT OIL,TOCOPHEROL,GELLAN GUM, POTASSIUM SORBATE, SQUALANE, ORYZA SATIVA (RICE) BRAN EXTRACT, GLYCERYL CAPRYLATE, HELIANTHUS ANNUUS (SUNFLOWER) SEED OIL, PHENYLPROPANOL.                                                                | <b>Novatopia emollient cream (placebo):</b> AQUA, CETEARYL ALCOHOL, CAPRYLIC/CAPRIC TRIGLYCERIDE, PARAFFINUM LIQUIDUM, GLYCERIN, HYDROGENATED POLYDECENE, DIMETHICONE, TRILAURETH-4 PHOSPHATE, CETEARYL GLUCOSIDE, GLYCERYL MYRISTATE, CAPRYLYL GLYCOL, SODIUM STEAROYL LACTYLATE, LANOLIN, COCOS NUCIFERA OIL, XANTHAN GUM, GELLAN GUM, POTASSIUM SORBATE, BUTYROSPERMUM PARKII BUTTER, DIISOPROPYL DIMER DILINOLEATE, GLYCERYL CAPRYLATE, ETHYLHEXYL STEARATE, CITRIC ACID, PHENYLPROPANOL, GLUCOSE, PANTHENOL, PERSEA GRATISSIMA OIL, PHYTOSTEROLS, OLEA EUROPAEA FRUIT OIL, SQUALANE, CHAMOMILLA RECUTITA FLOWER EXTRACT, BHT, SORBITAN OLEATE, BISABOLOL, TOCOPHERYL ACETATE, LAVANDULA HYBRIDA OIL, ASCORBYL PALMITATE, AZULENE.                                                                                                       |
| <b>Novatopia emollient ato-balance face:</b> AQUA, PROPYLHEPTYL CAPRYLATE, PERSEA GRATISSIMA OIL, CAPRYLIC/CAPRIC TRIGLYCERIDE, CETEARYL OLIVATE, SORBITAN OLIVATE, BUTYLENE GLYCOL, SORBITOL, BUTYROSPERMUM PARKII BUTTER, GLYCERIN, INULIN, BEHENYL ALCOHOL, PHYTOSTEROLS, CETYL PALMITATE, PHENOXYETHANOL, SODIUM POLYACRYLATE, SORBITAN PALMITATE, OLEA EUROPAEA FRUIT OIL, GLYCERYL UNDECYLENATE, PARFUM, ALPHA-GLUCAN OLIGOSACCHARIDE, CAPRYLYL GLYCOL, TOCOPHEROL, ORYZA SATIVA BRAN EXTRACT, ETHYLHEXYLGLYCERIN, ALISMA PLANTAGO AQUATICA EXTRACT, CALENDULA OFFICINALIS FLOWER EXTRACT, HELIANTHUS ANNUUS SEED OIL, TETRASODIUM GLUTAMATE DIACETATE, SORBITAN OLEATE, ASCORBYL PALMITATE, TOCOPHERYL ACETATE.                                                                                                                             | <b>Novatopia emollient ato-balance face (placebo):</b> AQUA, CAPRYLIC/CAPRIC TRIGLYCERIDE, CETEARYL OLIVATE, SORBITAN OLIVATE, BUTYROSPERMUM PARKII BUTTER, GLYCERIN, PERSEA GRATISSIMA OIL, BEHENYL ALCOHOL, PHYTOSTEROLS, PROPYLHEPTYL CAPRYLATE, PHENOXYETHANOL, SODIUM POLYACRYLATE, OLEA EUROPAEA FRUIT OIL, GLYCERYL UNDECYLENATE, PARFUM, CAPRYLYL GLYCOL, ETHYLHEXYLGLYCERIN, CETYL PALMITATE, SORBITAN PALMITATE, SORBITAN OLEATE, CALENDULA OFFICINALIS FLOWER EXTRACT, ASCORBYL PALMITATE, TOCOPHERYL ACETATE, TOCOPHEROL.                                                                                                                                                                                                                                                                                                        |
